# Supplementary material for: The antioxidative properties of S-allyl cysteine not only influence somatic cells but also improve early embryo cleavage in pigs
Source: PeerJ. 2016 Aug 4;4:e2280. doi: 10.7717/peerj.2280 (PMC4991846; doi:10.7717/peerj.2280)
Supplement: Supplemental Information 3 [file peerj-04-2280-s003.xlsx]

## Sheet: activating potential
		0.0 mM SAC	0.1 mM SAC	0.5 mM SAC	1.0 mM SAC
MII oocytes	rep. 1	2	0	1	2
	rep. 2	2	1	1	2
	rep. 3	2	0	1	1
	rep. 4	1	1	2	2
activated oocytes	rep. 1	28	30	29	28
	rep. 2	28	29	29	28
	rep. 3	28	30	29	29
	rep. 4	29	29	28	28
%		0.0 mM SAC	0.1 mM SAC	0.5 mM SAC	1.0 mM SAC
MII oocytes	rep. 1	6.66667	0	3.33333	6.66667
	rep. 2	6.66667	3.33333	3.33333	6.66667
	rep. 3	6.66667	0	3.33333	3.33333
	rep. 4	3.33333	3.33333	6.66667	6.66667
activated oocytes	rep. 1	93.3333	100	96.6667	93.3333
	rep. 2	93.3333	96.6667	96.6667	93.3333
	rep. 3	93.3333	100	96.6667	96.6667
	rep. 4	96.6667	96.6667	93.3333	93.3333
mean		0.0 mM SAC	0.1 mM SAC	0.5 mM SAC	1.0 mM SAC
MII oocytes		5.83333	1.66667	4.16667	5.83333
activated oocytes		94.1667	98.3333	95.8333	94.1667
SD		0.0 mM SAC	0.1 mM SAC	0.5 mM SAC	1.0 mM SAC
MII oocytes		1.66667	1.9245	1.66667	1.66667
activated oocytes		1.66667	1.9245	1.66667	1.66667
SEM		0.0 mM SAC	0.1 mM SAC	0.5 mM SAC	1.0 mM SAC
MII oocytes		0.833333	0.96225	0.833333	0.833333
activated oocytes		0.833333	0.96225	0.833333	0.833333

## Sheet: cleavage rate
		0.0 mM SAC	0.1 mM SAC	0.5 mM SAC	1.0 mM SAC
zygotes	rep. 1	28	19	16	16
	rep. 2	27	18	18	16
	rep. 3	28	16	17	18
	rep. 4	27	17	17	18
embryos	rep. 1	2	11	14	14
	rep. 2	3	12	12	14
	rep. 3	2	14	13	12
	rep. 4	3	13	13	12
%		0.0 mM SAC	0.1 mM SAC	0.5 mM SAC	1.0 mM SAC
zygotes	rep. 1	93.3333	63.3333	53.3333	53.3333
	rep. 2	90	60	60	53.3333
	rep. 3	93.3333	53.3333	56.6667	60
	rep. 4	90	56.6667	56.6667	60
embryos	rep. 1	6.66667	36.6667	46.6667	46.6667
	rep. 2	10	40	40	46.6667
	rep. 3	6.66667	46.6667	43.3333	40
	rep. 4	10	43.3333	43.3333	40
mean		0.0 mM SAC	0.1 mM SAC	0.5 mM SAC	1.0 mM SAC
zygotes		91.6667	58.3333	56.6667	56.6667
embryos		8.33333	41.6667	43.3333	43.3333
SD		0.0 mM SAC	0.1 mM SAC	0.5 mM SAC	1.0 mM SAC
zygotes		1.9245	4.30331	2.72166	3.849
embryos		1.9245	4.30331	2.72166	3.849
SEM		0.0 mM SAC	0.1 mM SAC	0.5 mM SAC	1.0 mM SAC
zygotes		0.96225	2.15166	1.36083	1.9245
embryos		0.96225	2.15166	1.36083	1.9245
